# Supplementary material for: Effect of Multiply Twinned Ag(0) Nanoparticles on Photocatalytic Properties of TiO2 Nanosheets and TiO2 Nanostructured Thin Films
Source: MDPI journal article supplement (doi:10.3390/nano12050750), 2022-02-23
Supplement: s1 [file s1]

## Supplementary Information

# Effect of Multiply Twinned Ag<sup>(0)</sup> Nanoparticles on Photocatalytic Properties of TiO<sub>2</sub> Nanosheets and TiO<sub>2</sub> Nanostructured Thin Films

Snejana Bakardjieva <sup>1,2,\*</sup>, Jakub Mares <sup>1,2</sup>, Eva Koci <sup>1</sup>, Jakub Tolasz <sup>1</sup>, Radek Fajgar <sup>3</sup>,  
Vasyl Ryukhtin <sup>4</sup>, Mariana Klementova <sup>5</sup>, Štefan Michna <sup>2</sup>, Hana Bibova <sup>6</sup>, Randi Holmestad <sup>7</sup>,  
Rositsa Titorenkova <sup>8</sup> and Maria Caplovicova <sup>9</sup>

**Citation:** Bakardjieva, S.; Mares, J.; Koci, E.; Tolasz, J.; Fajgar, R.; Ryukhtin, V.; Klementova, M.; Michna, Š.; Bibova, H.; Holmestad, R.; et al. Effect of Multiply Twinned Ag<sup>(0)</sup> Nanoparticles on Photocatalytic Properties of TiO<sub>2</sub> Nanosheets and TiO<sub>2</sub> Nanostructured Thin Films. *Nanomaterials* **2022**, *12*, 750. <https://doi.org/10.3390/nano12050750>

Academic Editors: Kyungsu Na and Marianna Kemell

Received: 10 January 2022

Accepted: 17 February 2022

Published: 23 February 2022

**Publisher's Note:** MDPI stays neutral with regard to jurisdictional claims in published maps and institutional affiliations.

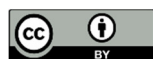

**Copyright:** © 2022 by the authors. Licensee MDPI, Basel, Switzerland. This article is an open access article distributed under the terms and conditions of the Creative Commons Attribution (CC BY) license (<https://creativecommons.org/licenses/by/4.0/>).

- <sup>1</sup> Institute of Inorganic Chemistry of the Czech Academy of Sciences, 250 68 Husinec-Rez, Czech Republic; mares@iic.cas.cz (J.M.); evulekotule@iic.cas.cz (E.K.); jtolasz@iic.cas.cz (J.T.)
  - <sup>2</sup> Faculty of Mechanical Engineering, JE Purkyně University, Pasteurova 1, 400 96 Ústí nad Labem, Czech Republic; stefan.michna@ujep.cz
  - <sup>3</sup> Institute of Chemical Process and Fundamentals of the Czech Academy of Sciences, Rozvojova 2/135, 165 02 Prague, Czech Republic; fajgar@icpf.cas.cz
  - <sup>4</sup> Nuclear Physics Institute of Czech Academy of Sciences, 250 68 Husinec-Rez, Czech Republic; ryukhtin@ujf.cas.cz
  - <sup>5</sup> Institute of Physics of the Czech Academy of Sciences, Na Slovance 1999/2, 182 21 Prague, Czech Republic; klemari@fzu.cz
  - <sup>6</sup> J. Heyrovsky Institute of Physical Chemistry of the Czech Academy of Sciences, Dolejskova 2155/3, 182 23 Prague, Czech Republic; hana.bibova@jh-inst.cas.cz
  - <sup>7</sup> Department of Physics, Norwegian University of Science and Technology (NTNU), NO 7491 Trondheim, Norway; randi.holmestad@ntnu.no
  - <sup>8</sup> Institute of mineralogy and crystallography, Bulgarian Academy of Sciences, 107, Acad. G. Bonchev Str., 1113 Sofia, Bulgaria; rositsatitorenkova@imc.bas.bg
  - <sup>9</sup> STU Centre for Nanodiagnostics, University Science Park Bratislava Centre, Slovak University of Technology, Vazovova 5, 811 07 Bratislava, Slovakia; maria.caplovicova@stuba.sk
- \* Correspondence: snejana@iic.cas.cz

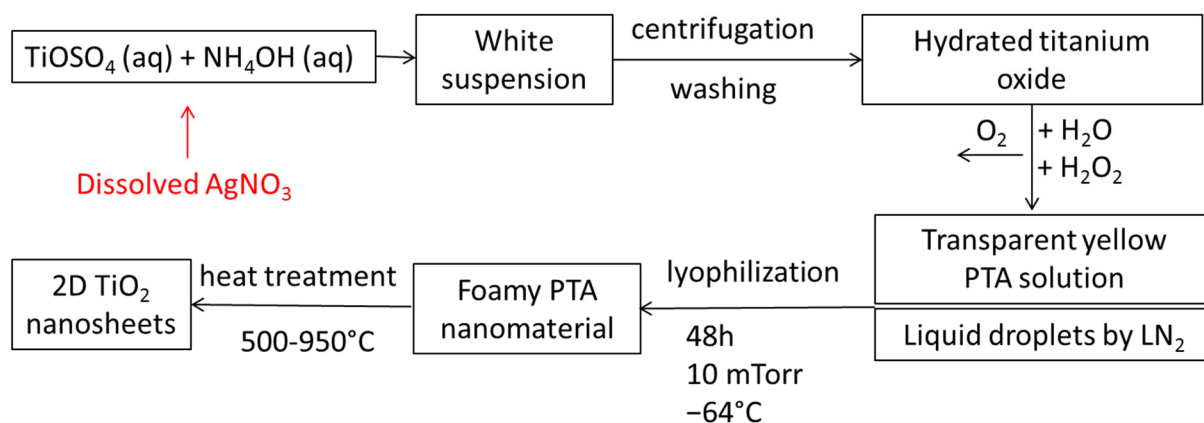

**Figure S1.** Synthetic route for the preparation of freeze-dried precursor for Ag-modified TiO<sub>2</sub> nanosheets.

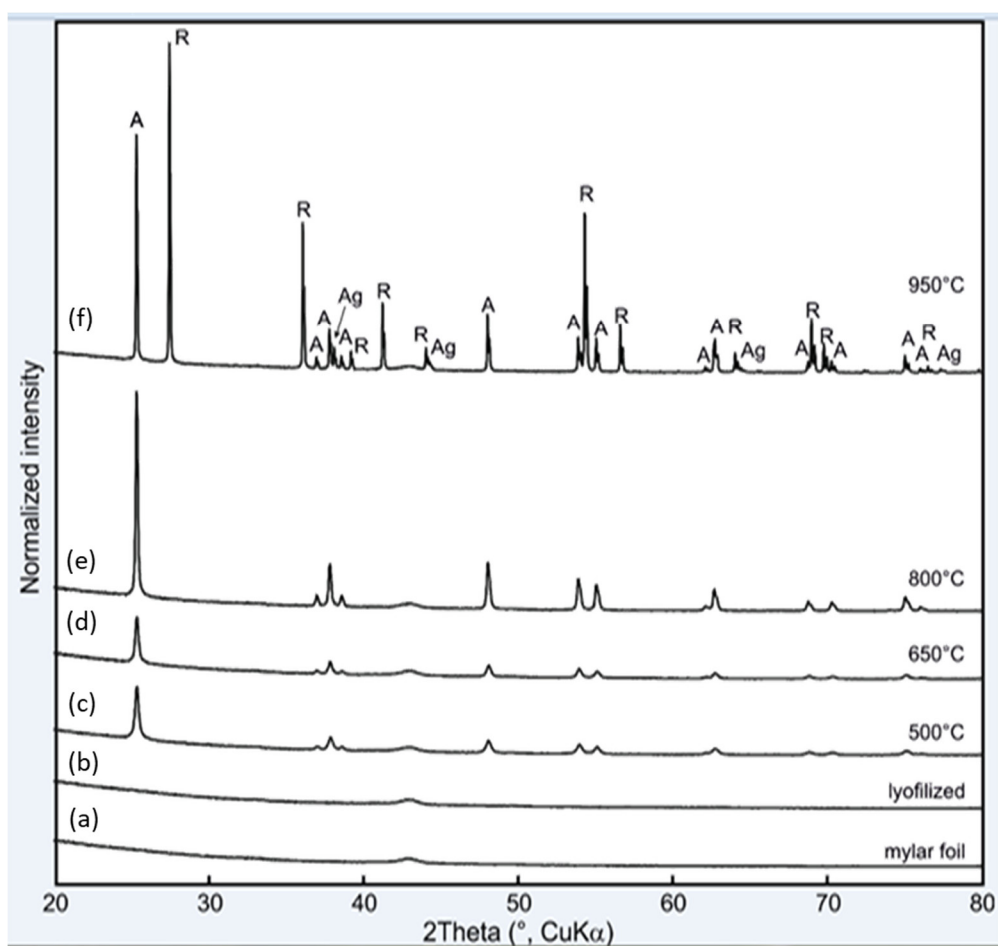

**Figure S2.** Powder XRD diffraction patterns of Ag modified 2D TiO<sub>2</sub> nanosheets: (a) Mylar foil, (b) lyophilized precursor Ag<sub>2</sub>TiO<sub>3</sub>LYO, (c) Ag<sub>2</sub>TiO<sub>3</sub>LYO/500 obtained at 500 °C, Ag<sub>2</sub>TiO<sub>3</sub>LYO/650 obtained at 650 °C, Ag<sub>2</sub>TiO<sub>3</sub>LYO/800 obtained at 800 °C, and Ag<sub>2</sub>TiO<sub>3</sub>LYO/950 obtained at 950 °C.

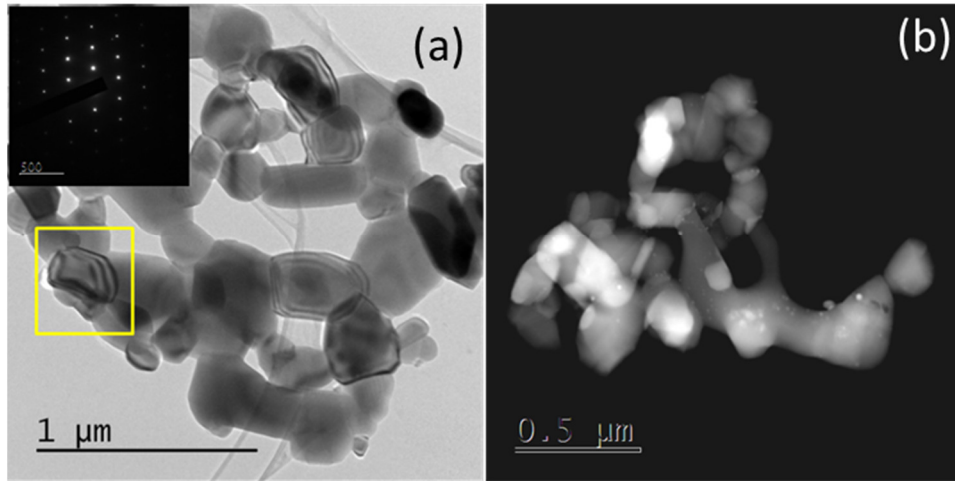

**Figure S3.** S/TEM images of (a) of Ag\_TiO\_LYO/950 with SAED inset confirming single nanocrystals of rutile, (b) HAADF image revealed Ag<sup>(0)</sup> NPs on the surface of TiO<sub>2</sub>.

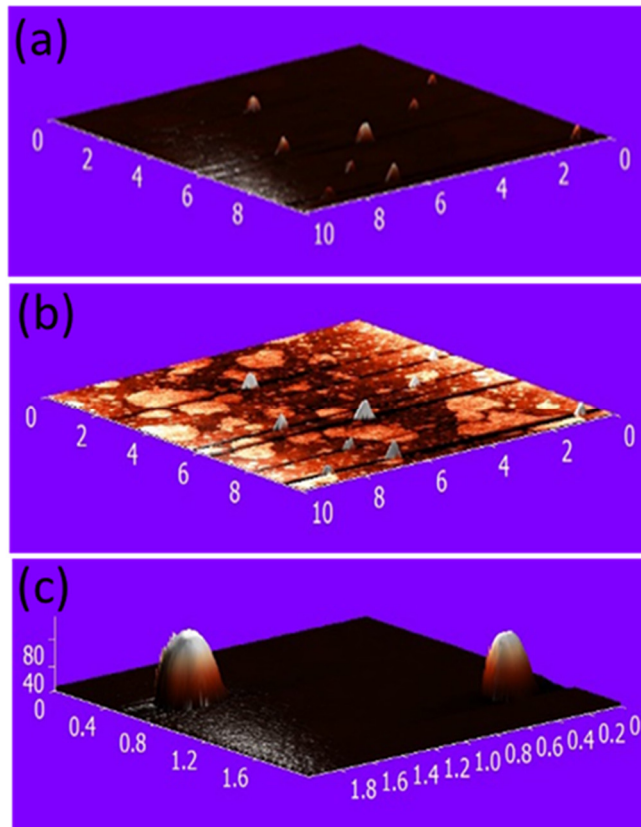

**Figure S4.** AFM 3D-images of the Ag\_TiO\_LYO/800 sample deposited on a glass substrate. (a) an image of the sample area of 10  $\mu\text{m} \times 10 \mu\text{m}$  with an offset of Z-axis zero setting that allows distinguishing only large nanoparticles, (b) the same image with an offset of Z-axis zero setting that allows distinguishing the nanostructure details with low height, (c) an image of the sample area with a size of 2  $\mu\text{m} \times 2 \mu\text{m}$  including only two nanoparticles.

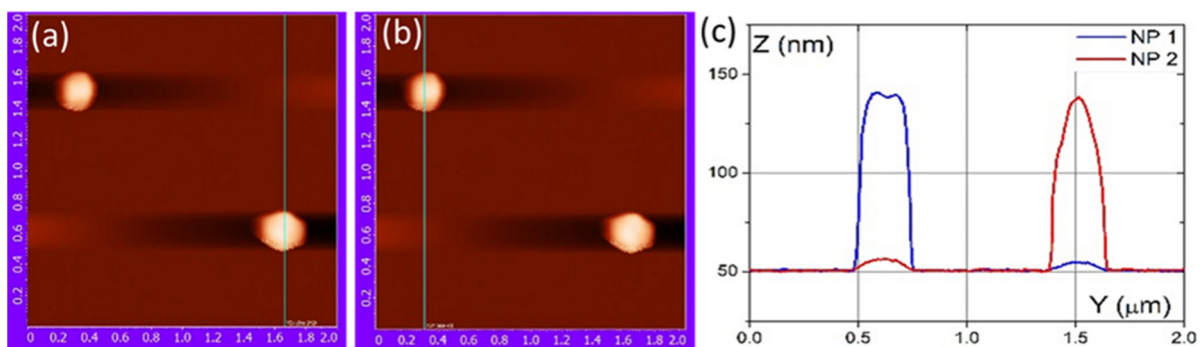

**Figure S5.** Profiling analysis of the 2D AFM image of the Ag\_TiO\_LYO/800 deposited on a glass substrate with a size of  $2\ \mu\text{m} \times 2\ \mu\text{m}$  including two NPs. (a) the image with Y-profiling along the right NP1, (b) the image with Y-profiling along the left NP2, (c) the plot of the profiles reflecting the size and height of the NP1 and NP2.

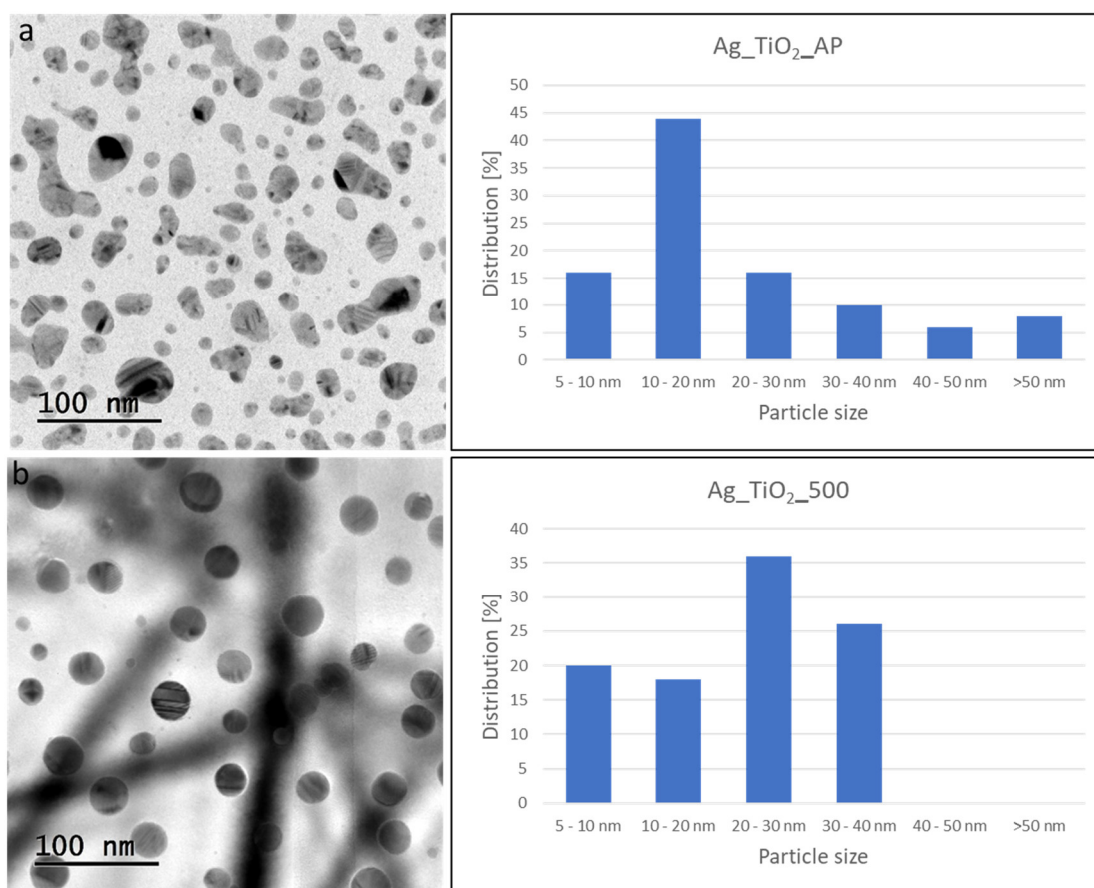

**Figure S6.** S/TEM image and distribution of nanoparticle size of NSTFs. (a) S/TEM image of Ag\_TiO<sub>2</sub>\_AP with the corresponding distribution of nanoparticle size and (b) S/TEM image Ag\_TiO<sub>2</sub>\_500 NSTF with the corresponding distribution of nanoparticle size obtained by ImageJ software.
